# Supplementary material
Source: PubMed Central journal article supplement (PMC5541894)

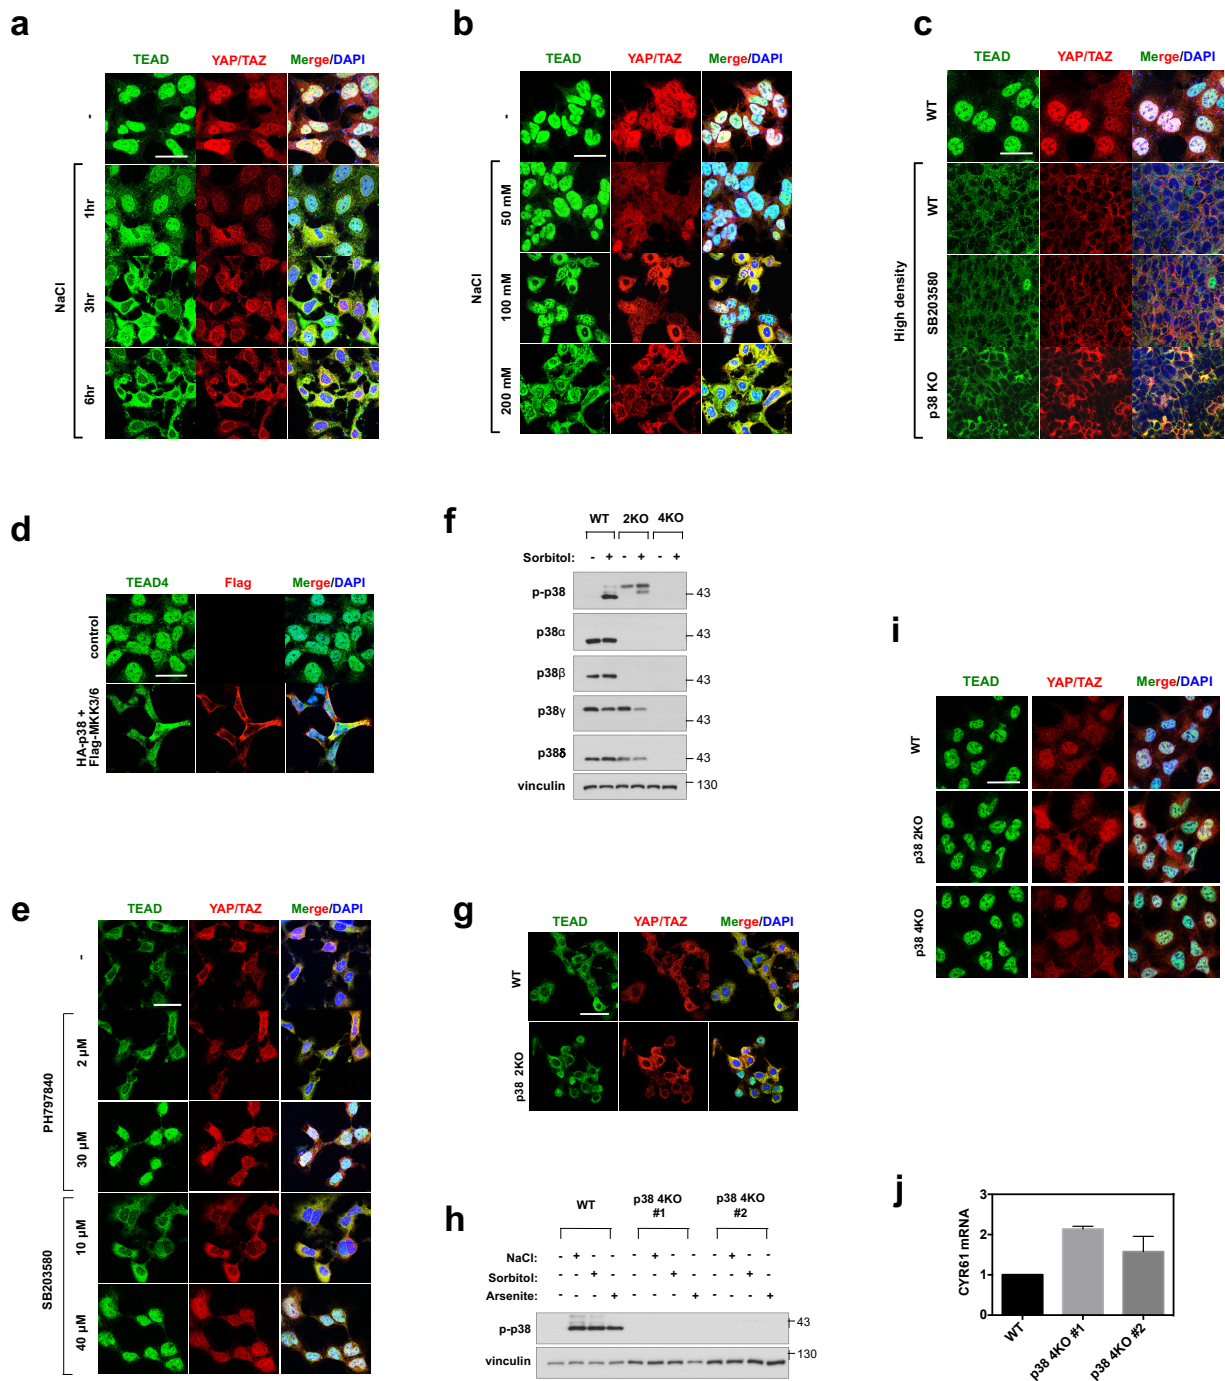

Figure S1

Supplement: NIHMS887136-supplement-1.pdf [file NIHMS887136-supplement-1.pdf]

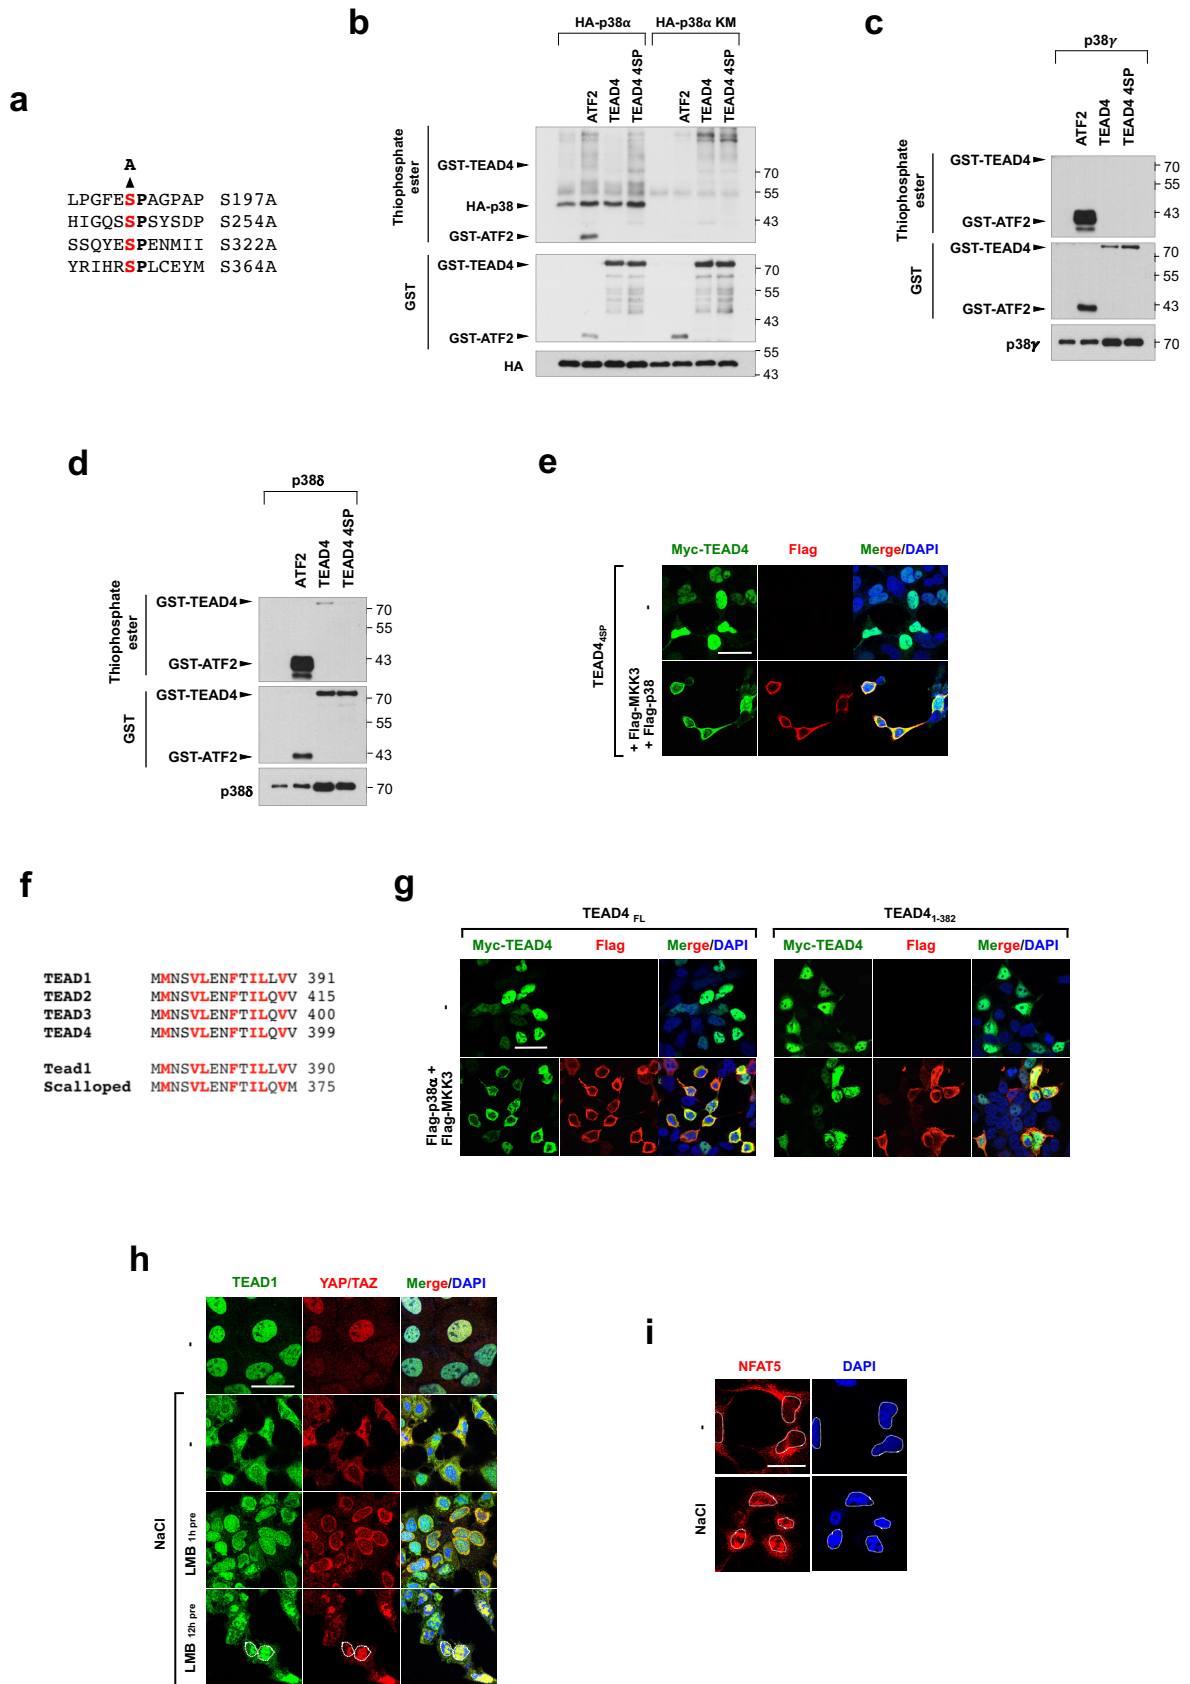

Figure S2

Supplement: NIHMS887136-supplement-2.pdf [file NIHMS887136-supplement-2.pdf]

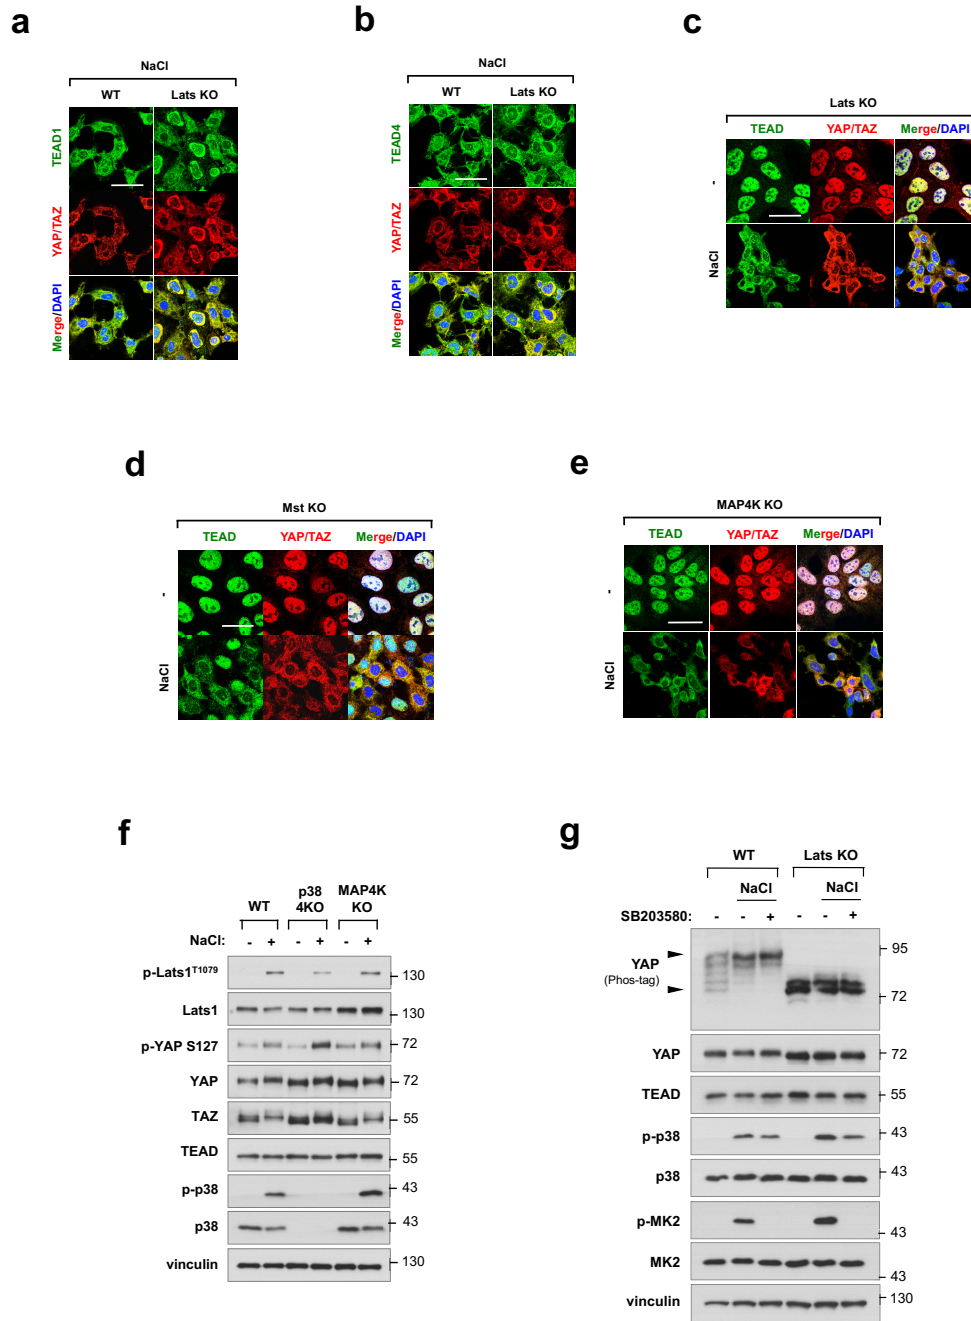

Figure S3

Supplement: NIHMS887136-supplement-3.pdf [file NIHMS887136-supplement-3.pdf]

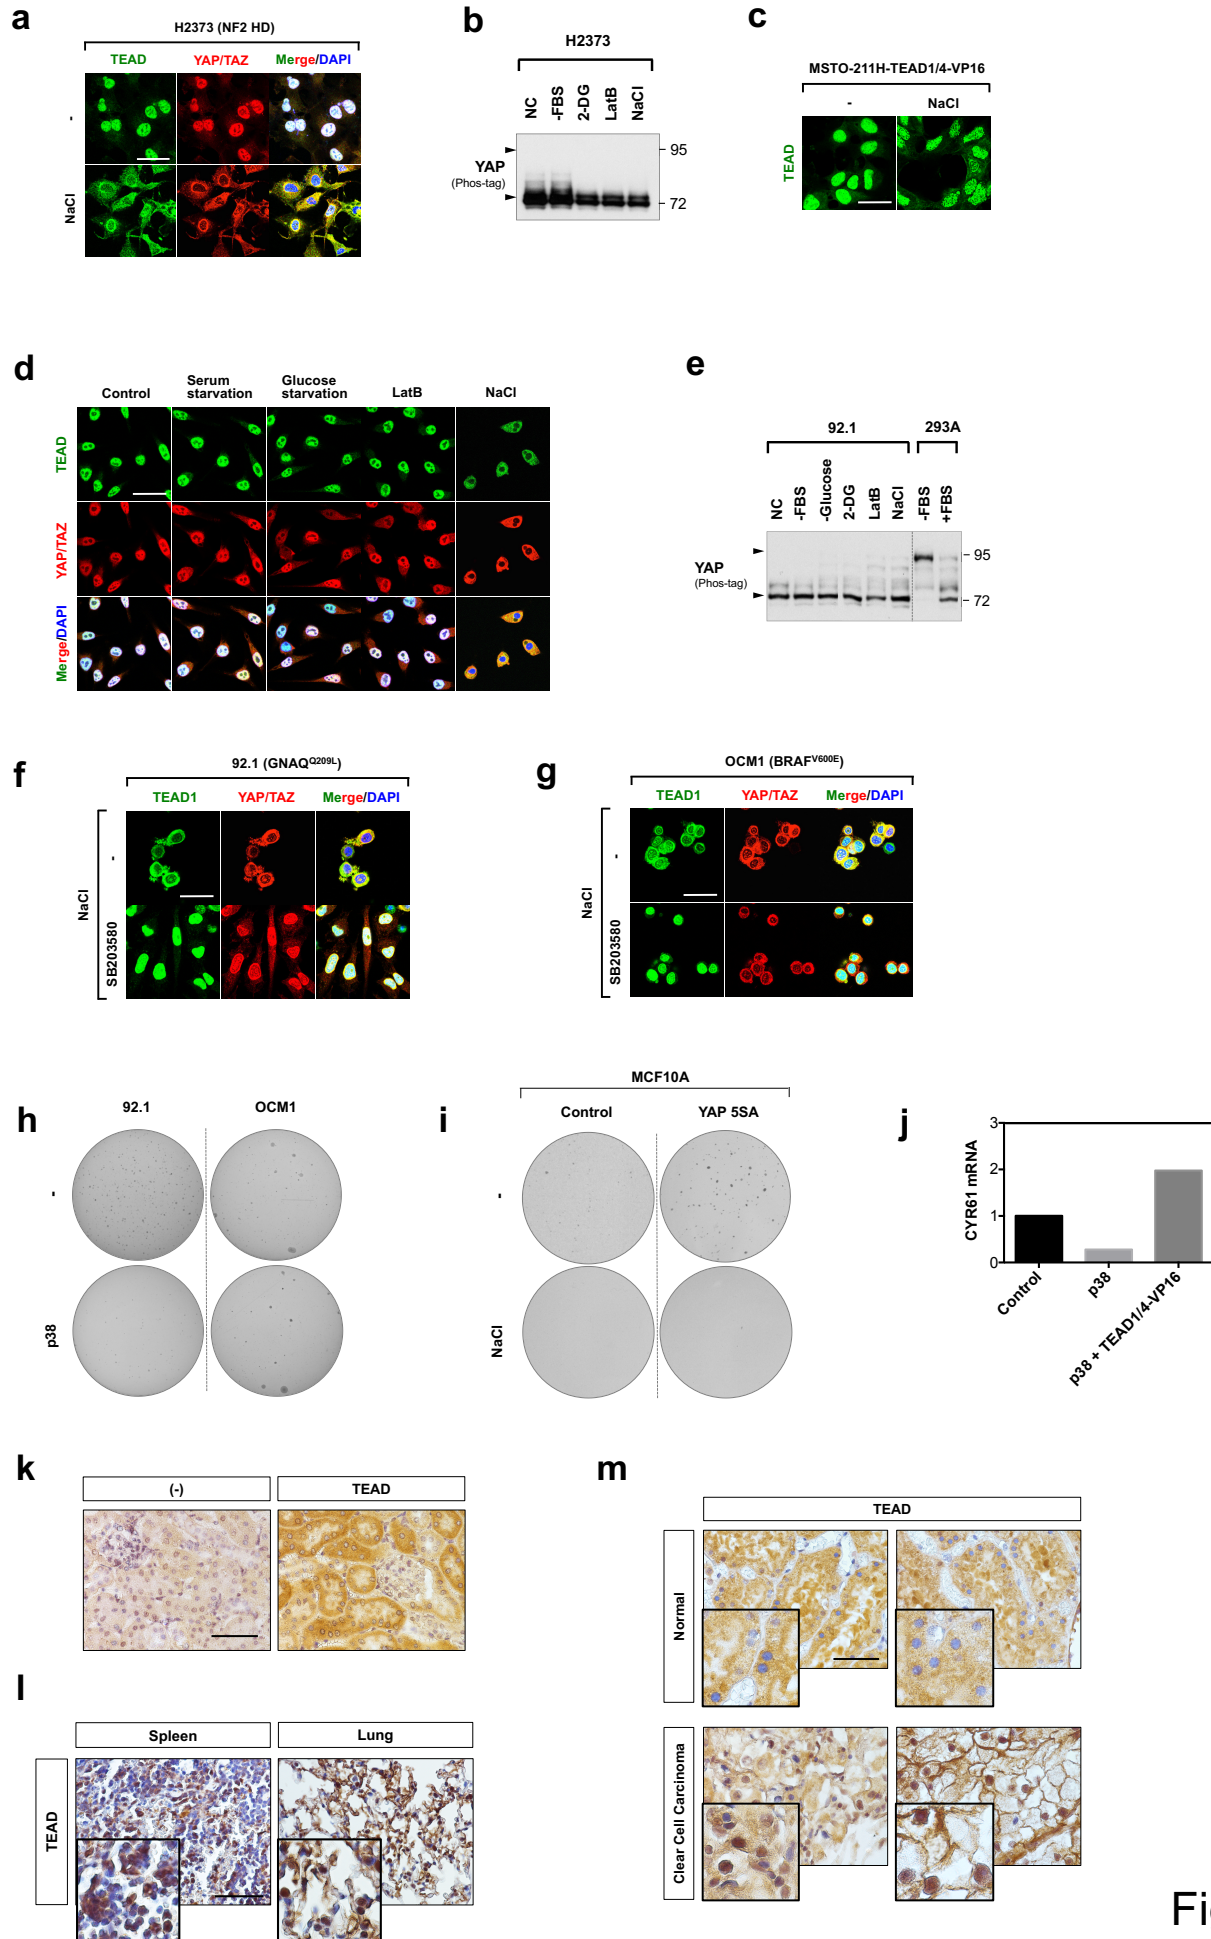

Figure S4

Supplement: NIHMS887136-supplement-4.pdf [file NIHMS887136-supplement-4.pdf]

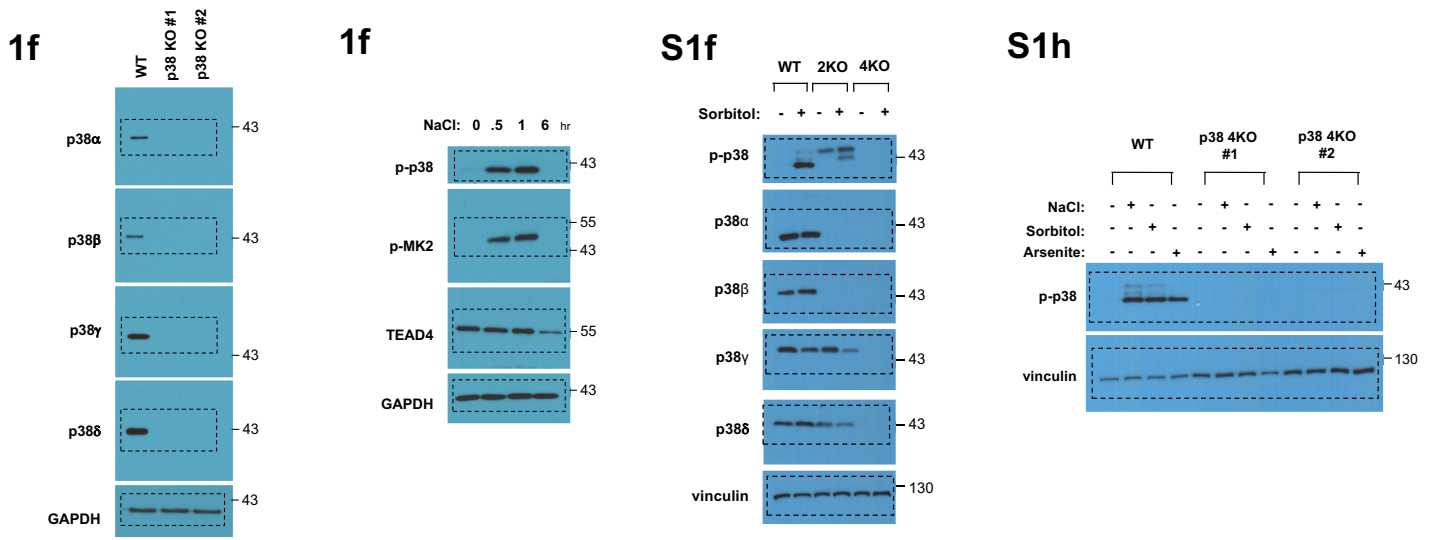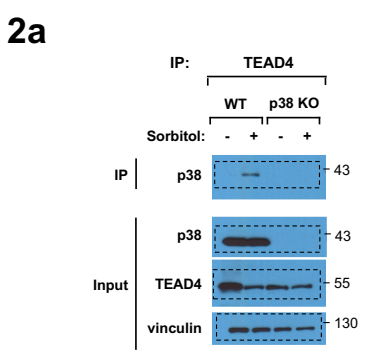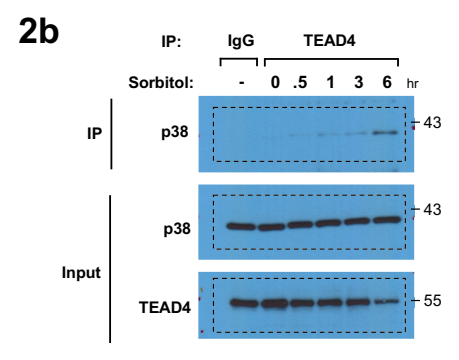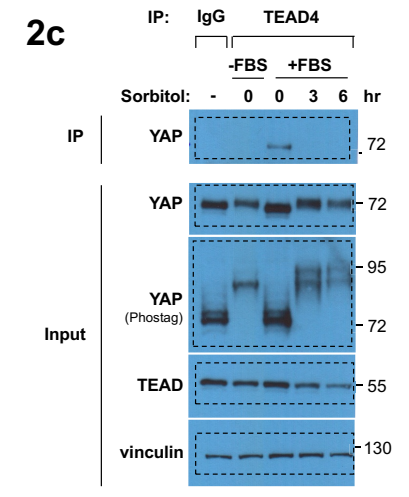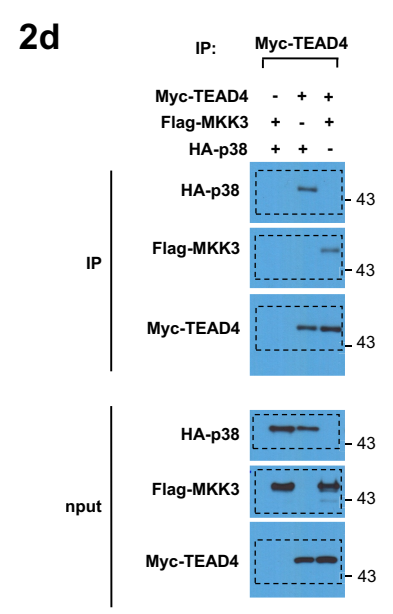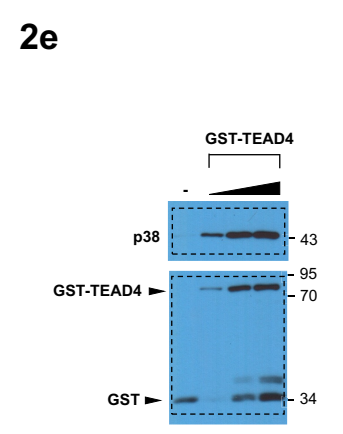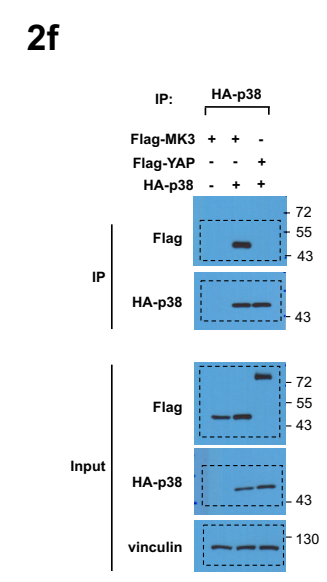

**2h**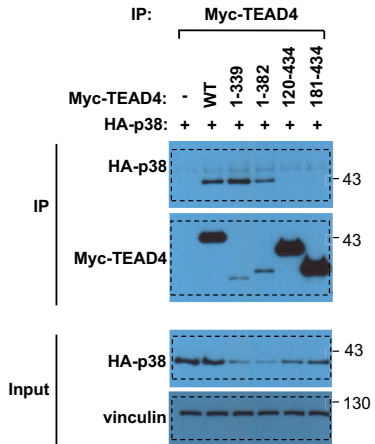**2i**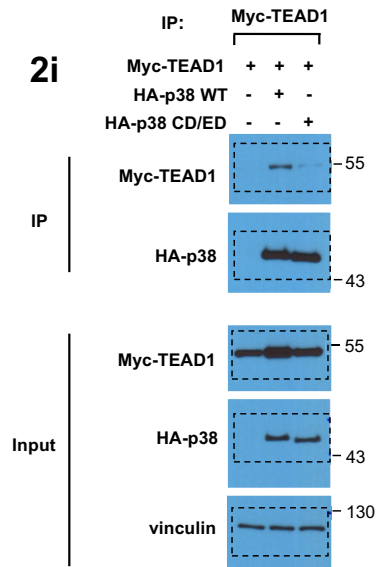**2j**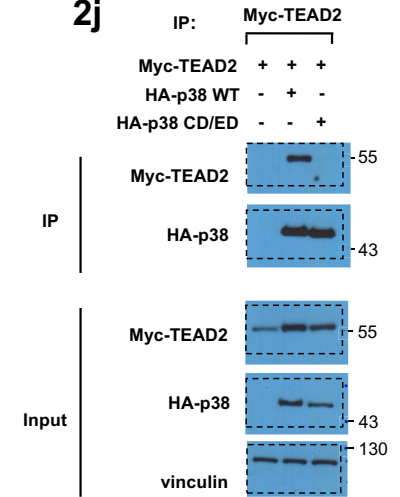**2k**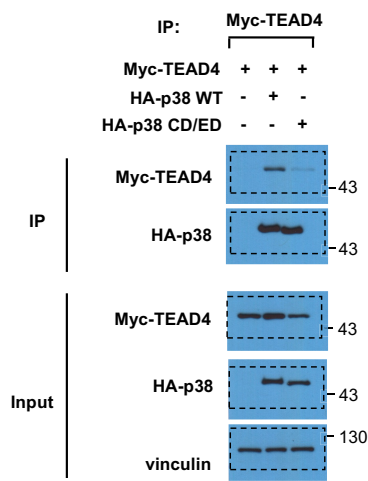**2m**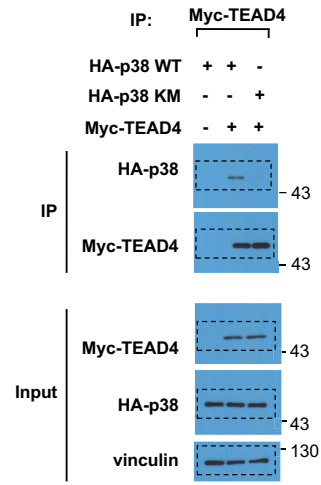**S2b**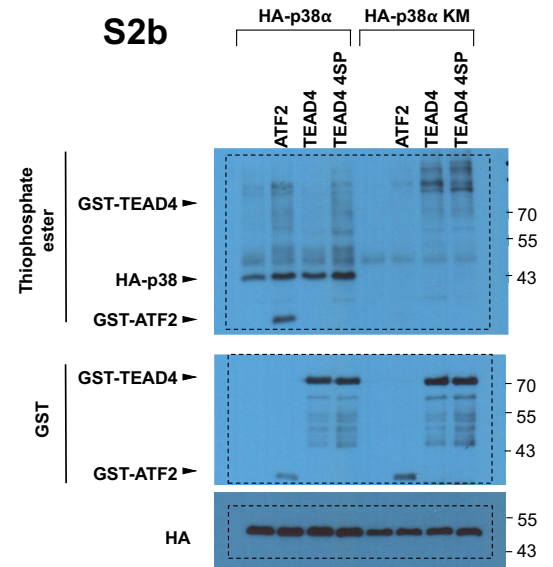**S2c**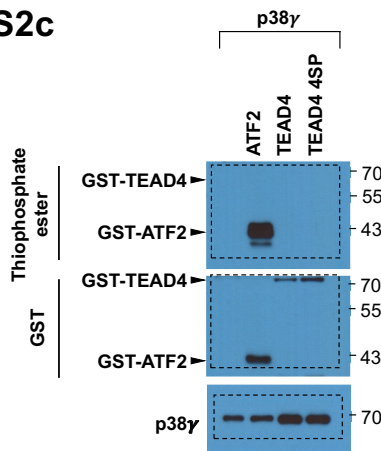**S2d**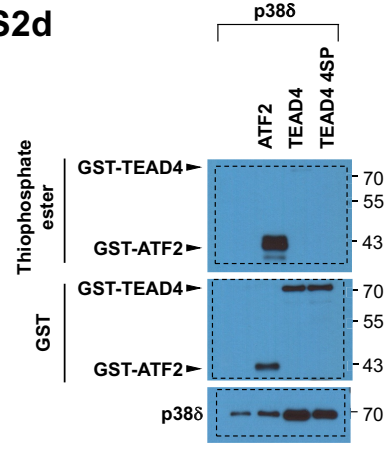

**3a**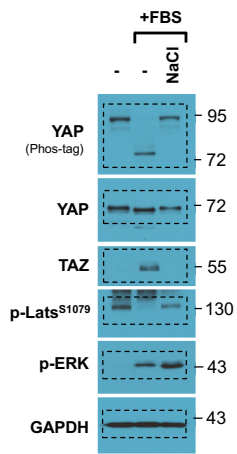**3c**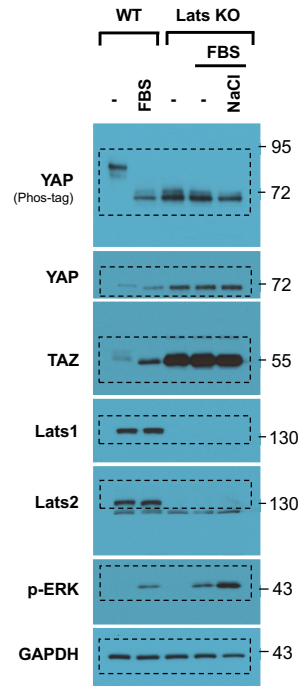**3f**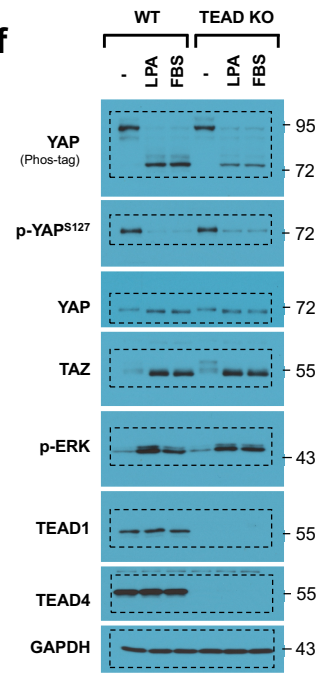**S3f**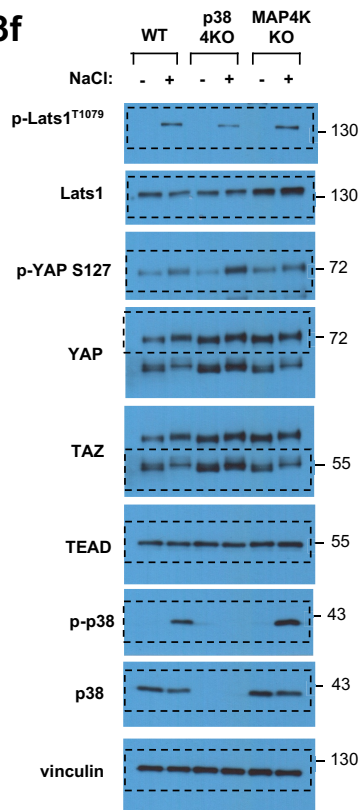**S3g**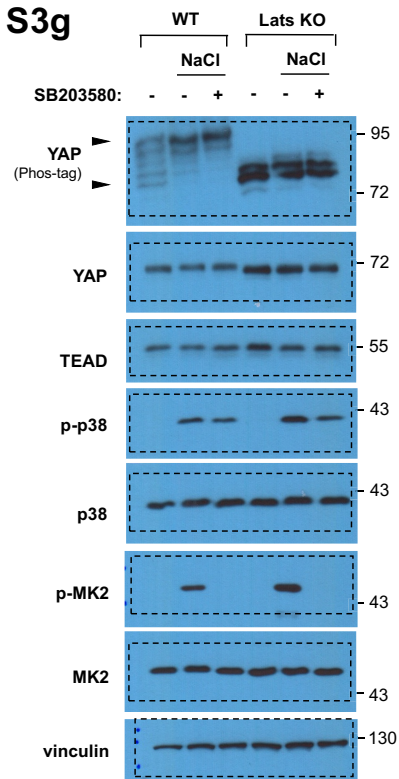

**4b**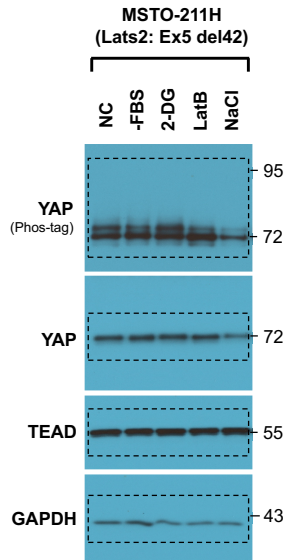**4d**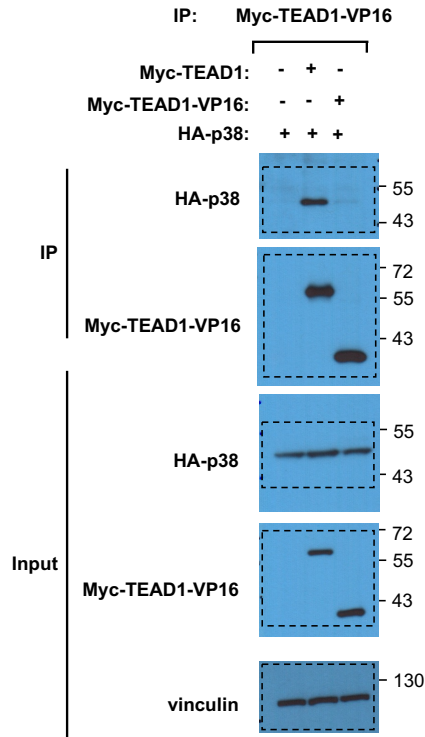**4e**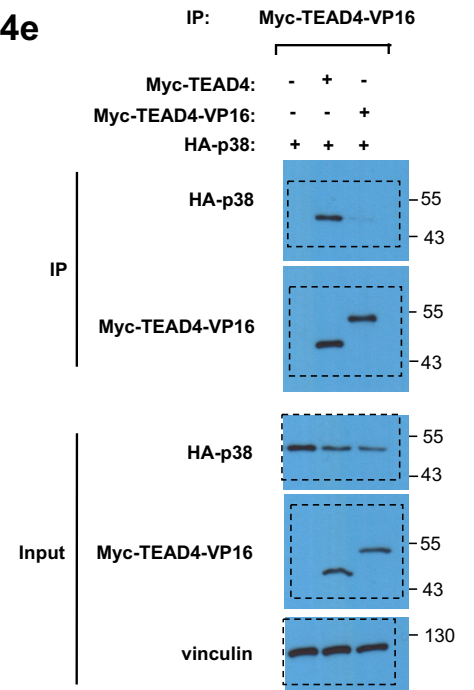**4f**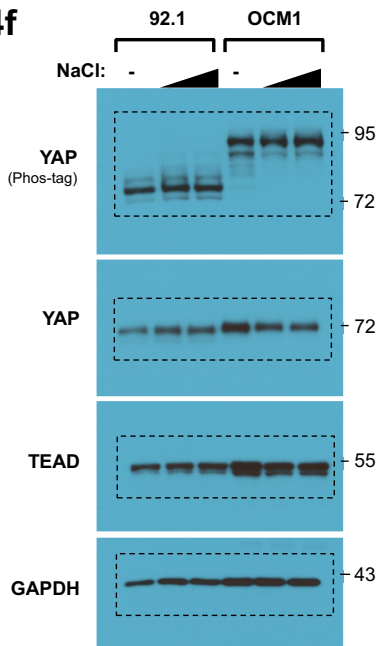**4i**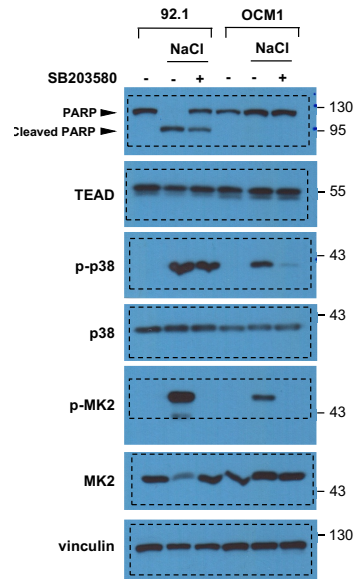**S4b**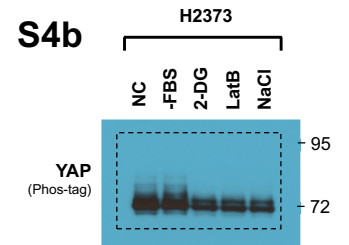**S4e**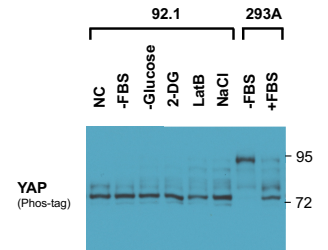

Supplement: NIHMS887136-supplement-5.pdf [file NIHMS887136-supplement-5.pdf]
